# Supplementary figures and images for: Adherence to a Mediterranean-Style Dietary Pattern and Cancer Risk in a Prospective Cohort Study
Source: MDPI journal article supplement (doi:10.3390/nu13114064), 2021-11-13

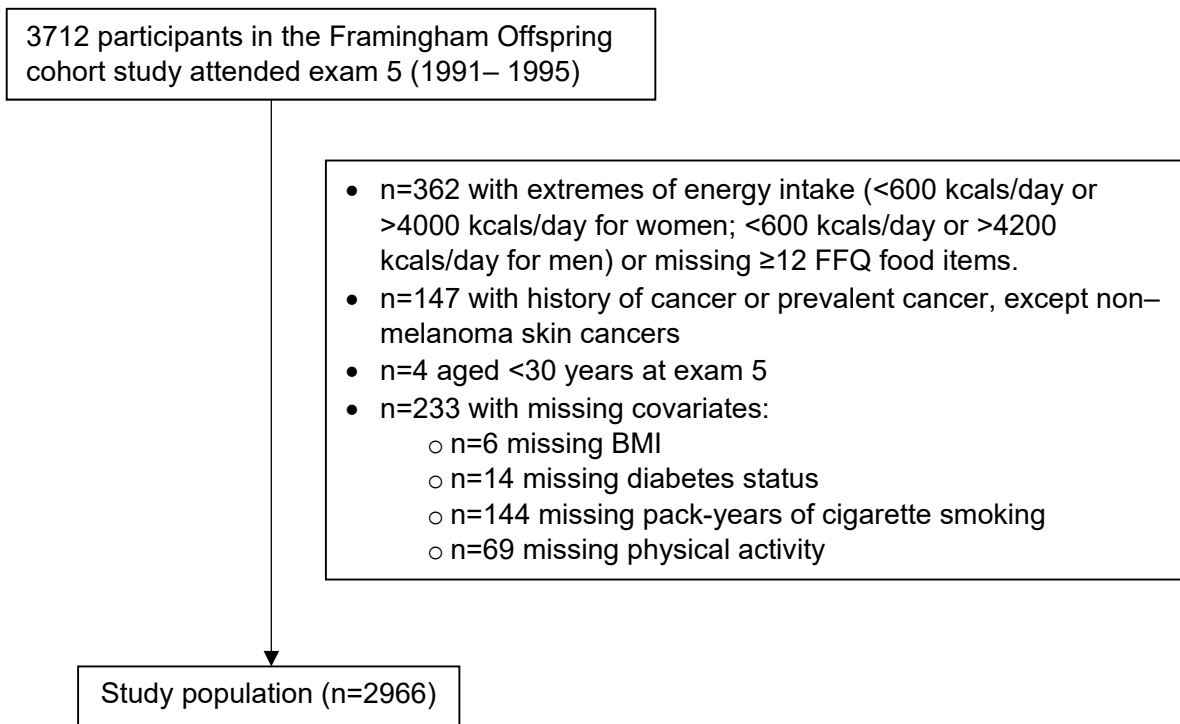

**Supplementary Figure S1.** Flowchart of study participants.

Supplement: s1 [file s1]
